# Supplementary material
Source: publisher figshare collection journal article supplement (https://asha.figshare.com/ndownloader/files/38221770)

## Supplemental Material S1. Specifications, comparisons, and diagnostics for the regression models used.

### R-code snippet for model fitting and comparison

#### Model fitting

```
model1 <- glm(Score ~ Age, data = data)
model2 <- glm(Score ~ poly(Age, 2, raw = T), data = data)
model3 <- glm(Score ~ poly(Age, 2, raw = T) * Gender, data = data)
model4 <- glm(Score ~ poly(Age, 3, raw = T) * Gender, data = data)
model5 <- glm(Score ~ log(Age) * Gender, data = data)
```

#### Model comparison

```
AIC(model1, model2, model3, model4, model5)
```

```
##      df      AIC
## model1  3 263.0674
## model2  4 253.3255
## model3  7 245.0314
## model4  9 247.8899
## model5  5 252.9714
```

#### Model diagnostics, Figure 2

```
plot(model1$fitted.values, model1$residuals) # Panel A
plot(model3$fitted.values, model3$residuals) # Panel B
qqnorm(model3$residuals) # Panel C
plot(hatvalues(m3), scale(m3$residuals, center = T, scale = T)) # Panel D
```

#### Generalized Variance inflation factors

```
car::vif(model3)

##              GVIF Df GVIF^(1/(2*Df))
## poly(Age, 2, raw = T)      3.884424  2      1.403885
## Gender                    68.590239  1      8.281922
## poly(Age, 2, raw = T):Gender 139.169554  2      3.434678
```

#### To get model predictions, we used

```
newdata <- data.frame(expand.grid(Age = seq(7, 30, 1), Gender = c("Male", "Female")))
newdata$Gender <- factor(newdata$Gender)
preds <- predict(model3, newdata, se.fit = T)
```

## Controlling for stuttering severity

To control for differences in (overt) stuttering severity, we entered OASES Item 1 into another model:

*Model 6:  $\widehat{Impact}$*

$$\begin{aligned} &= b_0 + b_1age + b_2age^2 + b_3sex + b_4(age \times sex) + b_5(age^2 \times sex) \\ &+ b_6severity \end{aligned}$$

where  $b_0 - b_5$  are exactly as in *Model 3*. But  $b_6$  adjusts the other coefficients based on the influence that stuttering severity had on the OASES impact score. The model is illustrated in Figure S1, panel A, had an AIC of 226,  $r_{adj}^2 = .23$ , and generalized variance inflation factors (VIFs) of 1.4, 8.3, 3.4, and 1.0 for the predictors age, sex, age  $\times$  sex, and stuttering severity. The model diagnostics held up like *Model 3*, see Figure S1, panel B-C. Of most importance, the curvilinear relationship describing that adolescent female report the most adverse impact of their stuttering *on average* was much the same as the unadjusted relationship of *Model 3* reported in Figure 1 in the main text. In Figure S1, panel A, we illustrate the *average* trends and CIs for age and sex combination when OASES Item 1 responses are data at response category 3 (the median response for both females and males in this sample). In short, controlling for self-reported stuttering severity did not impact the result reported in the main text.

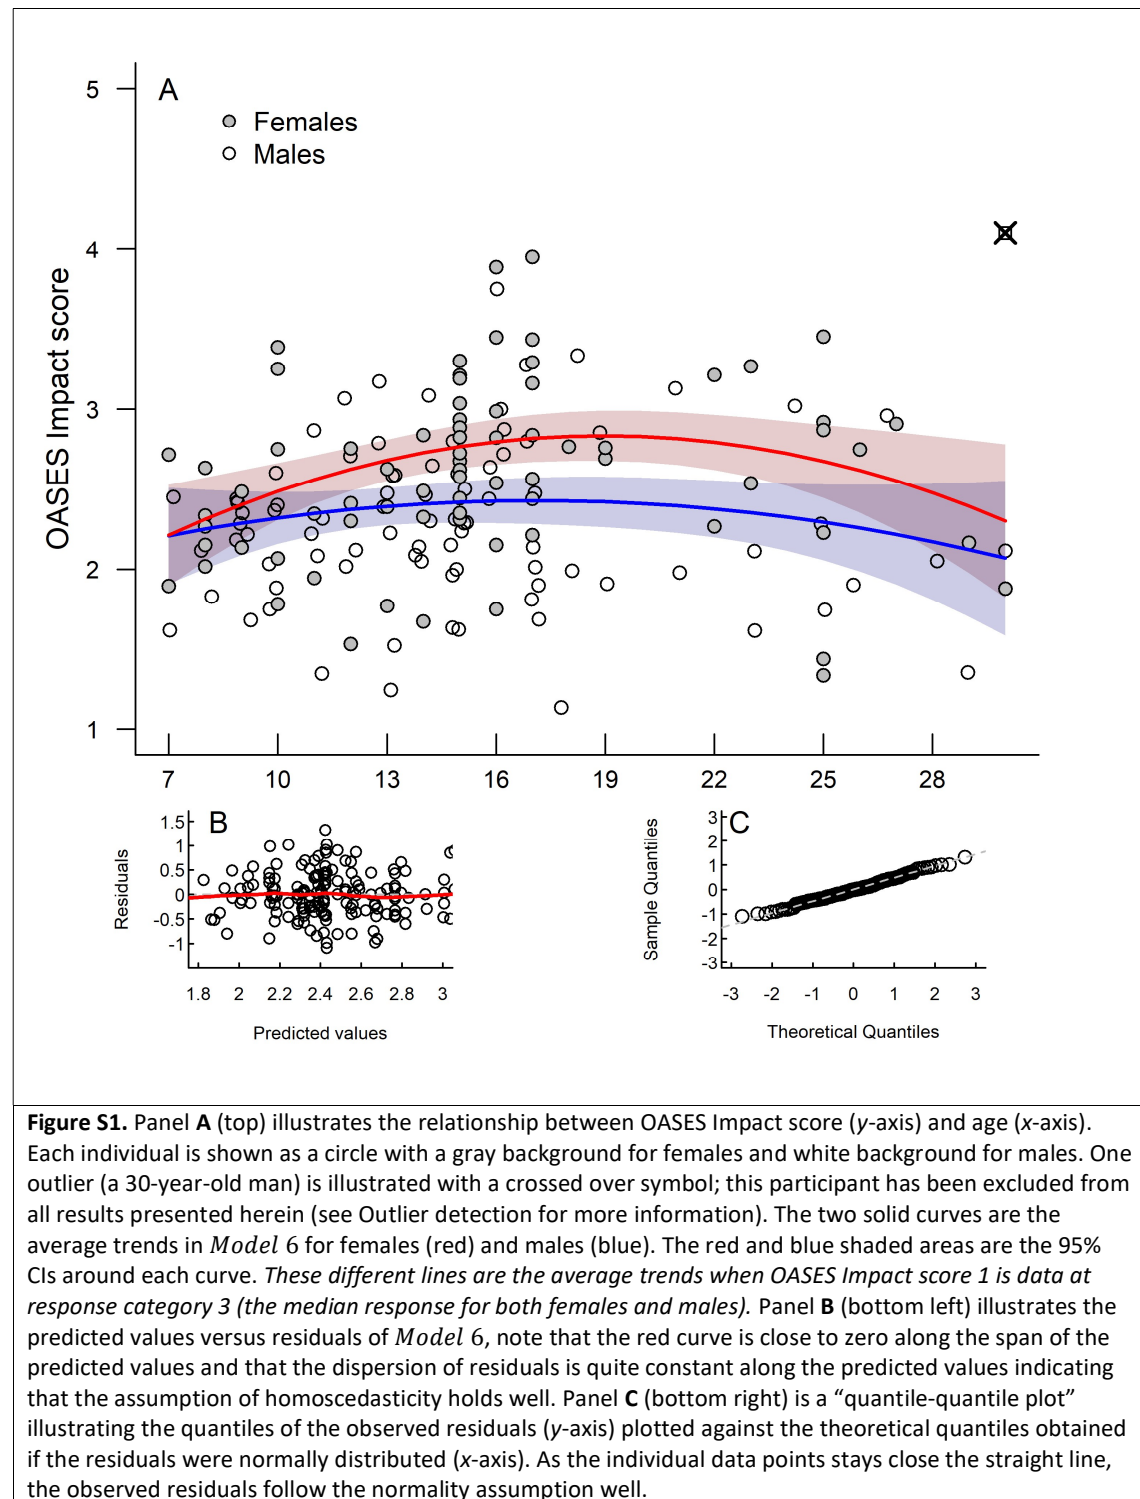

Supplement: Supplementary file 1 [file 38221770]
